# Supplementary material for: Ruminal methane emissions, metabolic, and microbial profile of Holstein steers fed forage and concentrate, separately or as a total mixed ration
Source: PLoS One. 2018 Aug 15;13(8):e0202446. doi: 10.1371/journal.pone.0202446 (PMC6093700; doi:10.1371/journal.pone.0202446)
Supplement: S6 Table — Kendall’s non parametric correlation matrix of the dominant bacterial genera across the rumen samples. The genera were included in the matrix if they were in at least 50% of the steers and represented at least 0.1% of the bacterial community in at least one of the steers. (XLSX) [file pone.0202446.s007.xlsx]

## Sheet: Correlation coefficient TMR
S6 Table. Correlation coefficients between efficiency parameter and genus abundance in steers fed TMR.
	Prevotella	Bacteroides	Parabacteroides	CF231	YRC22	Succiniclasticum	Leuconostoc	Clostridium	Anaerostipes	Coprococcus	Anaerovibrio	RFN20	Butyrivibrio	Lactobacillus	Ruminococcus	Succinivibrio	SHD231	Pirellulaceae	Methanobrevibacter	CH4	rumimal pH	Acetate	Propionate	Isobutyrate	Butyrate	Isovalerate	NH3
Prevotella	1
Bacteroides	-0.666667	1
Parabacteroides	-0.333333	0	1
CF231	0.666667	-1	0	1
YRC22	-0.333333	0	0.333333	0	1
Succiniclasticum	0	-0.333333	0.666667	0.333333	0	1
Leuconostoc	-0.666667	1	0	-1	0	-0.333333	1
Clostridium	-0.333333	0.666667	0.333333	-0.666667	-0.333333	0	0.666667	1
Anaerostipes	-1	0.666667	0.333333	-0.666667	0.333333	0	0.666667	0.333333	1
Coprococcus	-0.182574	0.182574	-0.547723	-0.182574	0.182574	-0.912871	0.182574	-0.182574	0.182574	1
Anaerovibrio	0.707107	-0.707107	0.235702	0.707107	-0.235702	0.707107	-0.707107	-0.235702	-0.707107	-0.774597	1
RFN20	-0.547723	0.912871	-0.182574	-0.912871	-0.182574	-0.547723	0.912871	0.547723	0.547723	0.4	-0.774597	1
Butyrivibrio	0.333333	0	-0.333333	0	-1	0	0	0.333333	-0.333333	-0.182574	0.235702	0.182574	1
Lactobacillus	-0.333333	0	0.333333	0	1	0	0	-0.333333	0.333333	0.182574	-0.235702	-0.182574	-1	1
Ruminococcus	0.333333	0	-1	0	-0.333333	-0.666667	0	-0.333333	-0.333333	0.547723	-0.235702	0.182574	0.333333	-0.333333	1
Succinivibrio	-0.816497	0.816497	0.408248	-0.816497	0	0	0.816497	0.816497	0.816497	0	-0.57735	0.67082	0	0	-0.408248	1
SHD231	0	0.333333	0	-0.333333	-0.666667	0.333333	0.333333	0.666667	0	-0.547723	0.235702	0.182574	0.666667	-0.666667	0	0.408248	1
Pirellulaceae	0.333333	0	-0.333333	0	-1	0	0	0.333333	-0.333333	-0.182574	0.235702	0.182574	1	-1	0.333333	0	0.666667	1
Methanobrevibacter	0	0.333333	-0.666667	-0.333333	-0.666667	-0.333333	0.333333	0	0	0.182574	-0.235702	0.547723	0.666667	-0.666667	0.666667	0	0.333333	0.666667	1
CH4	0	-0.333333	0.666667	0.333333	0	1	-0.333333	0	0	-0.912871	0.707107	-0.547723	0	0	-0.666667	0	0.333333	0	-0.333333	1
rumimalpH	1	-0.666667	-0.333333	0.666667	-0.333333	0	-0.666667	-0.333333	-1	-0.182574	0.707107	-0.547723	0.333333	-0.333333	0.333333	-0.816497	0	0.333333	0	0	1
Acetate	1	-0.666667	-0.333333	0.666667	-0.333333	0	-0.666667	-0.333333	-1	-0.182574	0.707107	-0.547723	0.333333	-0.333333	0.333333	-0.816497	0	0.333333	0	0	1	1
Propionate	-0.666667	0.333333	0	-0.333333	0.666667	-0.333333	0.333333	0	0.666667	0.547723	-0.707107	0.182574	-0.666667	0.666667	0	0.408248	-0.333333	-0.666667	-0.333333	-0.333333	-0.666667	-0.666667	1
Isobutyrate	-0.333333	0.666667	0.333333	-0.666667	-0.333333	0	0.666667	1	0.333333	-0.182574	-0.235702	0.547723	0.333333	-0.333333	-0.333333	0.816497	0.666667	0.333333	0	0	-0.333333	-0.333333	0	1
Butyrate	-0.666667	1	0	-1	0	-0.333333	1	0.666667	0.666667	0.182574	-0.707107	0.912871	0	0	0	0.816497	0.333333	0	0.333333	-0.333333	-0.666667	-0.666667	0.333333	0.666667	1
Isovalerate	-1	0.666667	0.333333	-0.666667	0.333333	0	0.666667	0.333333	1	0.182574	-0.707107	0.547723	-0.333333	0.333333	-0.333333	0.816497	0	-0.333333	0	0	-1	-1	0.666667	0.333333	0.666667	1
NH3	-0.666667	0.333333	0	-0.333333	0.666667	-0.333333	0.333333	0	0.666667	0.547723	-0.707107	0.182574	-0.666667	0.666667	0	0.408248	-0.333333	-0.666667	-0.333333	-0.333333	-0.666667	-0.666667	1	0	0.333333	0.666667	1
